# Supplementary material for: Identification of eQTLs for Hepatic Xbp1s and Socs3 Gene Expression in Mice Fed a High-Fat, High-Caloric Diet
Source: Oxford University Press journal article supplement (doi:10.1534/g3.115.016626), 2015-01-26
Supplement: 016626_016626si.pdf [file 016626_016626si.pdf]

**Identification of eQTLs for Hepatic *Xbp1s* and *Socs3* Gene Expression in Mice fed a High-Fat, High Caloric Diet**

Sarina Pasricha<sup>\*,§</sup>, Jane Kenney-Hunt<sup>\*\*</sup>, Kristy Anderson<sup>\*</sup>, Nadereh Jafari<sup>§§</sup>, Rabea A. Hall<sup>\*\*\*</sup>, Frank Lammert<sup>\*\*\*</sup>, James Cheverud<sup>§§§</sup>, and Richard M. Green<sup>\*1</sup>

<sup>\*</sup>Department of Internal Medicine, Northwestern University, Chicago, IL, <sup>§</sup>Department of Internal Medicine, University of North Carolina, Chapel Hill, NC, <sup>\*\*</sup>Department of Biology and Environmental Science, Westminster College, Fulton, MO, <sup>§§</sup>Center for Genetic Medicine, Northwestern University, Chicago, IL. <sup>\*\*\*</sup>Department of Medicine II, Saarland University Medical Center, Homburg, Germany, <sup>§§§</sup>Department of Biology, Loyola University, Chicago, IL.

Reference Numbers: GEO GSE56987, GeneNetwork GN325;

<sup>1</sup>Corresponding Author: Tarry Building 15-719, 303 East Chicago Avenue, Chicago, IL 60611. E-mail: [r-green2@northwestern.edu](mailto:r-green2@northwestern.edu)

**DOI: 10.1534/g3.115.016626**

**Table S1: Pearson correlation matrix of phenotypes using C57BL/6J and A/J mice**

|                | <b>IL6</b> | <b>Socs1</b> | <b>Socs3</b> | <b>Xbp1s</b> | <b>TRI</b> | <b>INSULIN</b> | <b>GLU</b> | <b>QUICKI</b> | <b>WT</b> | <b>ALT</b> |
|----------------|------------|--------------|--------------|--------------|------------|----------------|------------|---------------|-----------|------------|
| <b>IL6</b>     | 1.00       |              |              |              |            |                |            |               |           |            |
| <b>Socs1</b>   | 0.50       | 1.00         |              |              |            |                |            |               |           |            |
| <b>Socs3</b>   | 0.03       | 0.11         | 1.00         |              |            |                |            |               |           |            |
| <b>Xbp1s</b>   | 0.07       | 0.00         | 0.75         | 1.00         |            |                |            |               |           |            |
| <b>TRIG</b>    | -0.27      | -0.16        | 0.09         | 0.11         | 1.00       |                |            |               |           |            |
| <b>INSULIN</b> | -0.19      | -0.17        | -0.18        | -0.19        | 0.12       | 1.00           |            |               |           |            |
| <b>GLU</b>     | 0.14       | 0.14         | -0.16        | -0.17        | 0.01       | 0.11           | 1.00       |               |           |            |
| <b>QUICKI</b>  | 0.22       | 0.08         | 0.09         | 0.10         | -0.18      | -0.74          | -0.31      | 1.00          |           |            |
| <b>WT</b>      | -0.08      | -0.06        | 0.09         | -0.15        | 0.03       | 0.33           | 0.02       | -0.24         | 1.00      |            |
| <b>ALT</b>     | -0.02      | 0.03         | 0.05         | 0.06         | -0.08      | 0.16           | 0.002      | -0.14         | 0.15      | 1.00       |

TRI, triglyceride; GLU, glucose; WT, body weight gain

**Table S2: Phenotypes of A/J, C57BL/6J and F<sub>2</sub> (A/J x C57BL/6J) mice**

| <b>Phenotype</b>              | <b>A/J</b>  | <b>C57BL/6J</b> | <b>F<sub>2</sub> (A/J x C57BL/6J)</b> |
|-------------------------------|-------------|-----------------|---------------------------------------|
| No. of mice                   | 10          | 9               | 265                                   |
| Weight gain after 8 weeks (g) | 7.0 ± 0.3   | 17 ± 1.2*       | 16 ± 0.3*                             |
| Hepatic TG (mg/dl/g protein)  | 246 ± 21    | 667 ± 103*      | 492 ± 19*†                            |
| Fasting serum insulin (uU/mL) | 31 ± 3      | 125 ± 16*       | 52 ± 3†                               |
| Fasting serum glucose (mg/dL) | 270 ± 22    | 624 ± 36*       | 356 ± 9*†                             |
| QUICKI                        | 0.26 ± 0.03 | 0.21 ± 0.02*    | 0.25 ± 0.01                           |

Values are means ± SEM, \*p < 0.05 compared to A/J mice, †P < 0.05 compared to C57BL/6J mice.

Table S3: QTLs for metabolic syndrome phenotypes in studies of C57BL/6J and A/J mice fed a High-Fat, High-Caloric Diet

| Chr | Trait          | LOD         | SNP         | Position (Mb) | Interval (Mb) | # Genes |
|-----|----------------|-------------|-------------|---------------|---------------|---------|
| 1   | <b>insulin</b> | <b>4.11</b> | mCV24145570 | 195           | 182.1 - 195.0 | 86      |
| 4   | <b>wt gain</b> | <b>6.15</b> | rs3663950   | 135.7         | 128.2 - 154.4 | 431     |
| 7   | <b>insulin</b> | <b>4.29</b> | rs4226520   | 29.8          | 24.9 - 40.2   | 297     |
| 10  | <i>glucose</i> | <i>3.17</i> | rs13480569  | 30.7          | 28.3 - 31.0   | 15      |
| 11  | <i>insulin</i> | <i>3.21</i> | rs13480968  | 36.5          | 30.4 - 40.3   | 47      |
| 13  | <b>wt gain</b> | <b>6.64</b> | rs13481871  | 71.3          | 57.3 - 80.2   | 188     |
| 13  | <i>glucose</i> | <i>3.36</i> | rs13481983  | 103.4         | 97.3 - 112.0  | 79      |
| 14  | <i>insulin</i> | <i>3.23</i> | rs6169105   | 117.3         | 106.3 - 122.1 | 40      |
| 15  | <i>glucose</i> | <i>2.75</i> | rs13482673  | 82.2          | 72.2 - 101.6  | 490     |

Wt gain is body weight gain over 8 weeks. Glucose and insulin represent serum levels. # Genes = the number of genes and predicted genes within the interval. . Genes and physical positions were obtained from the Mouse Genome Informatics Database. QTLs in bold meet the 5% genome-wide significance threshold generated in R/qtl (Broman et al. 2003). QTLs in *italics* meet the less stringent 5% thresholds generated using the method of Li and Ji (Li and Ji 2005; Chen and Storey 2006).
