# Supplementary material for: Identification of eQTLs for Hepatic Xbp1s and Socs3 Gene Expression in Mice Fed a High-Fat, High-Caloric Diet
Source: Oxford University Press journal article supplement (doi:10.1534/g3.115.016626), 2015-01-26
Supplement: 016626_tables1.pdf [file 016626_tables1.pdf]

**Table S1: Pearson correlation matrix of phenotypes using C57BL/6J and A/J mice**

|                | <b>IL6</b> | <b>Socs1</b> | <b>Socs3</b> | <b>Xbp1s</b> | <b>TRI</b> | <b>INSULIN</b> | <b>GLU</b> | <b>QUICKI</b> | <b>WT</b> | <b>ALT</b> |
|----------------|------------|--------------|--------------|--------------|------------|----------------|------------|---------------|-----------|------------|
| <b>IL6</b>     | 1.00       |              |              |              |            |                |            |               |           |            |
| <b>Socs1</b>   | 0.50       | 1.00         |              |              |            |                |            |               |           |            |
| <b>Socs3</b>   | 0.03       | 0.11         | 1.00         |              |            |                |            |               |           |            |
| <b>Xbp1s</b>   | 0.07       | 0.00         | 0.75         | 1.00         |            |                |            |               |           |            |
| <b>TRIG</b>    | -0.27      | -0.16        | 0.09         | 0.11         | 1.00       |                |            |               |           |            |
| <b>INSULIN</b> | -0.19      | -0.17        | -0.18        | -0.19        | 0.12       | 1.00           |            |               |           |            |
| <b>GLU</b>     | 0.14       | 0.14         | -0.16        | -0.17        | 0.01       | 0.11           | 1.00       |               |           |            |
| <b>QUICKI</b>  | 0.22       | 0.08         | 0.09         | 0.10         | -0.18      | -0.74          | -0.31      | 1.00          |           |            |
| <b>WT</b>      | -0.08      | -0.06        | 0.09         | -0.15        | 0.03       | 0.33           | 0.02       | -0.24         | 1.00      |            |
| <b>ALT</b>     | -0.02      | 0.03         | 0.05         | 0.06         | -0.08      | 0.16           | 0.002      | -0.14         | 0.15      | 1.00       |

TRI, triglyceride; GLU, glucose; WT, body weight gain
