# Supplementary material for: Identification of eQTLs for Hepatic Xbp1s and Socs3 Gene Expression in Mice Fed a High-Fat, High-Caloric Diet
Source: Oxford University Press journal article supplement (doi:10.1534/g3.115.016626), 2015-01-26
Supplement: 016626_tables2.pdf [file 016626_tables2.pdf]

Table S2: Phenotypes of A/J, C57BL/6J and F<sub>2</sub> (A/J x C57BL/6J) mice

| Phenotype                     | A/J         | C57BL/6J     | F <sub>2</sub> (A/J x C57BL/6J) |
|-------------------------------|-------------|--------------|---------------------------------|
| No. of mice                   | 10          | 9            | 265                             |
| Weight gain after 8 weeks (g) | 7.0 ± 0.3   | 17 ± 1.2*    | 16 ± 0.3*                       |
| Hepatic TG (mg/dl/g protein)  | 246 ± 21    | 667 ± 103*   | 492 ± 19*†                      |
| Fasting serum insulin (uU/mL) | 31 ± 3      | 125 ± 16*    | 52 ± 3†                         |
| Fasting serum glucose (mg/dL) | 270 ± 22    | 624 ± 36*    | 356 ± 9*†                       |
| QUICKI                        | 0.26 ± 0.03 | 0.21 ± 0.02* | 0.25 ± 0.01                     |

Values are means ± SEM, \*p < 0.05 compared to A/J mice, †P < 0.05 compared to C57BL/6J mice.
