# Supplementary material for: Identification of eQTLs for Hepatic Xbp1s and Socs3 Gene Expression in Mice Fed a High-Fat, High-Caloric Diet
Source: PubMed Central journal article supplement (PMC4390565; doi:10.1534/g3.115.016626), 2015-01-23
Supplement: supp_g3.115.016626_TableS3.pdf [file supp_g3.115.016626_TableS3.pdf]

Table S3: QTLs for metabolic syndrome phenotypes in studies of C57BL/6J and A/J mice fed a High-Fat, High-Caloric Diet

| Chr | Trait          | LOD         | SNP         | Position (Mb) | Interval (Mb) | # Genes |
|-----|----------------|-------------|-------------|---------------|---------------|---------|
| 1   | <b>insulin</b> | <b>4.11</b> | mCV24145570 | 195           | 182.1 - 195.0 | 86      |
| 4   | <b>wt gain</b> | <b>6.15</b> | rs3663950   | 135.7         | 128.2 - 154.4 | 431     |
| 7   | <b>insulin</b> | <b>4.29</b> | rs4226520   | 29.8          | 24.9 - 40.2   | 297     |
| 10  | <i>glucose</i> | <i>3.17</i> | rs13480569  | 30.7          | 28.3 - 31.0   | 15      |
| 11  | <i>insulin</i> | <i>3.21</i> | rs13480968  | 36.5          | 30.4 - 40.3   | 47      |
| 13  | <b>wt gain</b> | <b>6.64</b> | rs13481871  | 71.3          | 57.3 - 80.2   | 188     |
| 13  | <i>glucose</i> | <i>3.36</i> | rs13481983  | 103.4         | 97.3 - 112.0  | 79      |
| 14  | <i>insulin</i> | <i>3.23</i> | rs6169105   | 117.3         | 106.3 - 122.1 | 40      |
| 15  | <i>glucose</i> | <i>2.75</i> | rs13482673  | 82.2          | 72.2 - 101.6  | 490     |

Wt gain is body weight gain over 8 weeks. Glucose and insulin represent serum levels. # Genes = the number of genes and predicted genes within the interval. . Genes and physical positions were obtained from the Mouse Genome Informatics Database. QTLs in bold meet the 5% genome-wide significance threshold generated in R/qtI (Broman et al. 2003). QTLs in *italics* meet the less stringent 5% thresholds generated using the method of Li and Ji (Li and Ji 2005; Chen and Storey 2006).
